# Supplementary material for: Good to Go First? Position Effects in Expert Evaluation of Early-Stage Ventures
Source: Atypon-hosted journal article supplement (doi:10.1287/mnsc.2021.4132), 2021-11-05
Supplement: mnsc.2021.4132.sm1.pdf [file mnsc.2021.4132.sm1.pdf]

**Table A1. Logit Coefficients Predicting Being Evaluated First**

|                                | Firm-expert level<br>Model 1 | Firm level<br>Model 2 |
|--------------------------------|------------------------------|-----------------------|
| Firm age                       | 0.048<br>(0.156)             | 0.075<br>(0.143)      |
| ln (1 + asset)                 | -0.008<br>(0.087)            | -0.015<br>(0.076)     |
| ln(1+ revenue)                 | -0.059<br>(0.054)            | -0.086*<br>(0.050)    |
| Net profit                     | 0.001*<br>(0.000)            | 0.001*<br>(0.000)     |
| ln(1+ employees)               | -0.333<br>(0.327)            | -0.442<br>(0.297)     |
| ln(1+ R&D personnel)           | 0.012<br>(0.335)             | 0.141<br>(0.305)      |
| ln(1+ R&D expenditure)         | 0.306**<br>(0.120)           | 0.336***<br>(0.107)   |
| Equity owners                  | -0.060<br>(0.047)            | -0.073<br>(0.045)     |
| Recommendation letter          | -0.620***<br>(0.223)         | -0.664***<br>(0.209)  |
| Hi-tech enterprise certificate | -0.003<br>(0.341)            | 0.062<br>(0.315)      |
| Founder education              | 0.173<br>(0.126)             | 0.150<br>(0.113)      |
| Startup competition award      | 0.982***<br>(0.270)          | 0.735***<br>(0.266)   |
| Cohort 2017                    | 0.034<br>(0.198)             | -0.294<br>(0.190)     |
| Industry dummies               | YES                          | YES                   |
| Development stage dummies      | YES                          | YES                   |
| Constant                       | -3.316***<br>(0.898)         | -3.040***<br>(0.830)  |
| X <sup>2</sup>                 | 44.216                       | 45.003                |
| Log likelihood                 | -2031.665                    | -484.680              |
| Observations                   | 14,690                       | 2938                  |

Note: Robust standard errors are reported in parentheses. \* $p > .10$ , \*\* $p > .05$ , \*\*\* $p > .01$  (two-tailed tests).

**Table A2. OLS Models of Firm-level Evaluation Scores of Early-Stage Tech Ventures (N=2938)**

|                                           | Model 1              | Model 2              | Model 3              | Model 4              |
|-------------------------------------------|----------------------|----------------------|----------------------|----------------------|
| Ever being first evaluation (1 vs. 0)     |                      | -4.005***<br>(0.678) |                      |                      |
| Frequency of being first evaluation (0-5) |                      |                      | -1.076***<br>(0.154) |                      |
| One occasion of first evaluation          |                      |                      |                      | 0.942<br>(1.392)     |
| Two occasions of first evaluation         |                      |                      |                      | -0.780<br>(2.417)    |
| Three occasions of first evaluation       |                      |                      |                      | -5.543***<br>(1.187) |
| Four occasions of first evaluation        |                      |                      |                      | -5.999***<br>(1.840) |
| Five occasions of first evaluation        |                      |                      |                      | -5.109***<br>(0.835) |
| Firm age at grant application             | -0.370*<br>(0.191)   | -0.361*<br>(0.189)   | -0.365*<br>(0.189)   | -0.366*<br>(0.190)   |
| ln(1 + asset)                             | 0.961***<br>(0.101)  | 0.958***<br>(0.101)  | 0.959***<br>(0.101)  | 0.959***<br>(0.101)  |
| ln(1+ revenue)                            | 0.152**<br>(0.068)   | 0.138**<br>(0.068)   | 0.142**<br>(0.068)   | 0.142**<br>(0.068)   |
| Net profit                                | 0.001***<br>(0.000)  | 0.001***<br>(0.000)  | 0.001***<br>(0.000)  | 0.001***<br>(0.000)  |
| ln(1+ employees)                          | -0.940**<br>(0.381)  | -1.010***<br>(0.377) | -1.000***<br>(0.377) | -0.973**<br>(0.378)  |
| ln(1+R&D personnel)                       | 2.322***<br>(0.399)  | 2.343***<br>(0.398)  | 2.327***<br>(0.397)  | 2.299***<br>(0.398)  |
| ln(R&D expenditure)                       | 0.270**<br>(0.131)   | 0.317**<br>(0.130)   | 0.315**<br>(0.130)   | 0.315**<br>(0.130)   |
| Number of equity owners                   | 0.432***<br>(0.069)  | 0.422***<br>(0.069)  | 0.423***<br>(0.069)  | 0.425***<br>(0.069)  |
| Recommendation letter                     | 2.212***<br>(0.262)  | 2.112***<br>(0.262)  | 2.111***<br>(0.261)  | 2.104***<br>(0.261)  |
| High-tech enterprise certificate          | 2.100***<br>(0.389)  | 2.109***<br>(0.384)  | 2.095***<br>(0.383)  | 2.097***<br>(0.384)  |
| Startup competition award                 | 3.576***<br>(0.418)  | 3.714***<br>(0.410)  | 3.793***<br>(0.409)  | 3.814***<br>(0.409)  |
| Cohort 2017                               | -4.119***<br>(0.251) | -4.166***<br>(0.250) | -4.113***<br>(0.249) | -4.122***<br>(0.249) |
| Constant                                  | 55.350***<br>(1.098) | 55.626***<br>(1.088) | 55.659***<br>(1.088) | 55.655***<br>(1.091) |
| R-Square                                  | 0.298                | 0.308                | 0.311                | 0.312                |
| Observations                              | 2938                 | 2938                 | 2938                 | 2938                 |

Note: Robust standard errors are reported in parentheses. \*p>.10, \*\* p>.05, \*\*\*p>.01 (two-tailed tests). Variables that are included in the analyses but not reported include - industry sector dummies, project development stage dummies, and founder education level dummies.

**Table A3. OLS Regression Coefficients Predicting Evaluation Duration Controlling for Observables**

|                                                                   | <b>Model 1</b>       | <b>Model 2</b>       | <b>Model 3</b>       | <b>Model 4</b>       |
|-------------------------------------------------------------------|----------------------|----------------------|----------------------|----------------------|
| First evaluation                                                  | 21.756***<br>(0.961) | 22.361***<br>(1.005) | 24.166***<br>(1.206) | 24.823***<br>(1.255) |
| Second evaluation                                                 | 9.169***<br>(0.625)  | 9.170***<br>(0.625)  | 9.174***<br>(0.626)  | 9.175***<br>(0.625)  |
| Third evaluation                                                  | 4.816***<br>(0.497)  | 4.819***<br>(0.497)  | 4.823***<br>(0.498)  | 4.827***<br>(0.499)  |
| Third to last evaluation                                          | -2.583***<br>(0.291) | -2.579***<br>(0.291) | -2.575***<br>(0.290) | -2.571***<br>(0.290) |
| Second to last evaluation                                         | -2.829***<br>(0.200) | -2.826***<br>(0.200) | -2.818***<br>(0.200) | -2.814***<br>(0.200) |
| Last evaluation                                                   | -2.239***<br>(0.290) | -2.236***<br>(0.291) | -2.234***<br>(0.291) | -2.231***<br>(0.291) |
| Expert: VC/PE background                                          | -0.966***<br>(0.360) | -0.753**<br>(0.359)  | -0.970***<br>(0.363) | -0.752**<br>(0.358)  |
| Expert: Prior review experience                                   | -0.948***<br>(0.189) | -0.950***<br>(0.189) | -0.788***<br>(0.184) | -0.788***<br>(0.184) |
| First evaluation x VC/PE                                          |                      | -6.608***<br>(2.094) |                      | -6.768***<br>(2.247) |
| First evaluation x prior review                                   |                      |                      | -4.735***<br>(1.686) | -4.810***<br>(1.675) |
| Expert: banks, insurance, and securities                          | -0.961***<br>(0.354) | -0.959***<br>(0.354) | -0.958***<br>(0.353) | -0.956***<br>(0.353) |
| Expert: public and non-profit                                     | -0.852**<br>(0.357)  | -0.849**<br>(0.357)  | -0.858**<br>(0.358)  | -0.854**<br>(0.358)  |
| Expert: Universities, public research institutions and state labs | -0.526<br>(0.322)    | -0.525<br>(0.322)    | -0.531*<br>(0.322)   | -0.531*<br>(0.323)   |
| Expert: State owned enterprises                                   | -0.056<br>(0.313)    | -0.057<br>(0.312)    | -0.058<br>(0.313)    | -0.059<br>(0.312)    |
| Expert: male                                                      | -1.216***<br>(0.214) | -1.214***<br>(0.214) | -1.213***<br>(0.212) | -1.211***<br>(0.212) |
| Expert: top school                                                | -0.095<br>(0.259)    | -0.093<br>(0.258)    | -0.100<br>(0.260)    | -0.098<br>(0.259)    |
| Expert: returnee                                                  | 0.080<br>(0.360)     | 0.086<br>(0.359)     | 0.081<br>(0.358)     | 0.087<br>(0.357)     |
| Expert role: finance                                              | -0.417<br>(0.274)    | -0.416<br>(0.274)    | -0.419<br>(0.275)    | -0.418<br>(0.274)    |
| Expert role: start-up mentor                                      | -0.514*<br>(0.285)   | -0.512*<br>(0.285)   | -0.517*<br>(0.284)   | -0.514*<br>(0.284)   |
| Firm age at grant application                                     | -0.008<br>(0.131)    | -0.006<br>(0.131)    | -0.004<br>(0.131)    | -0.002<br>(0.131)    |
| Ln(1 + asset)                                                     | 0.081<br>(0.068)     | 0.083<br>(0.068)     | 0.077<br>(0.068)     | 0.080<br>(0.068)     |
| Ln(1+ revenue)                                                    | -0.067<br>(0.050)    | -0.068<br>(0.050)    | -0.070<br>(0.050)    | -0.071<br>(0.050)    |
| Net profit                                                        | 0.000<br>(0.000)     | 0.000<br>(0.000)     | 0.000<br>(0.000)     | 0.000<br>(0.000)     |
| Ln(1+ employees)                                                  | -0.198<br>(0.281)    | -0.204<br>(0.281)    | -0.233<br>(0.281)    | -0.239<br>(0.281)    |
| Ln(1+R&D personnel)                                               | 0.588**<br>(0.280)   | 0.595**<br>(0.281)   | 0.623**<br>(0.280)   | 0.631**<br>(0.281)   |
| Ln(R&D expenditure)                                               | 0.042<br>(0.079)     | 0.041<br>(0.079)     | 0.050<br>(0.079)     | 0.049<br>(0.079)     |
| Number of equity owners                                           | 0.027<br>(0.038)     | 0.026<br>(0.038)     | 0.026<br>(0.039)     | 0.025<br>(0.039)     |
| Recommendation letter                                             | 0.503***<br>(0.184)  | 0.507***<br>(0.185)  | 0.505***<br>(0.184)  | 0.509***<br>(0.185)  |
| High-tech enterprise certificate                                  | 0.202<br>(0.272)     | 0.199<br>(0.272)     | 0.225<br>(0.269)     | 0.221<br>(0.269)     |
| Startup competition award                                         | 0.524*<br>(0.301)    | 0.503*<br>(0.304)    | 0.523*<br>(0.300)    | 0.501*<br>(0.303)    |
| Other controls                                                    | YES                  | YES                  | YES                  | YES                  |
| Constant                                                          | 9.929***<br>(1.686)  | 9.918***<br>(1.687)  | 9.855***<br>(1.679)  | 9.842***<br>(1.682)  |
| R-Square                                                          | 0.344                | 0.345                | 0.346                | 0.348                |
| Observations                                                      | 8165                 | 8165                 | 8165                 | 8165                 |

Note: Robust standard errors clustered around firms are reported in parentheses. \*p>.10, \*\* p>.05, \*\*\*p>.01 (two-tailed tests). Variables that are included in the analyses but not reported include - industry sector dummies, project development stage dummies, founder education level dummies, expert education level dummies, expert birth year, month and place dummies, and expert academic field dummies.
